1 ***K. pneumoniae* ST258 genomic variability and bacteriophage susceptibility**

2

3 Carola Venturini<sup>1#,\*</sup>, Nouri Ben Zakour<sup>1\*</sup>, Bethany Bowring<sup>1</sup>, Sandra Morales<sup>2</sup>, Robert Cole<sup>2</sup>,

4 Zsuzsanna Kovach<sup>2</sup>, Steven Branston<sup>2</sup>, Emma Kettle<sup>3</sup>, Nicholas Thomson<sup>4,5</sup>, Jonathan

5 Iredell<sup>1#</sup>

6

7 <sup>1</sup>Centre for Infectious Diseases and Microbiology, The Westmead Institute for Medical  
8 Research, The University of Sydney and Westmead Hospital, Sydney, Australia;

9 <sup>2</sup>AmpliPhi Australia Pty Ltd, Sydney, Australia;

10 <sup>3</sup>Westmead Research Hub Electron Microscope Core Facility, The Westmead Institute for  
11 Medical Research, The University of Sydney, Sydney, Australia;

12 <sup>4</sup>Parasites and Microbes, Wellcome Trust Sanger Centre, Cambridge, United Kingdom;

13 <sup>5</sup>The London School of Hygiene and Tropical Medicine, London, United Kingdom.

14 \*These authors contributed equally to this work.

15

16 **Short title: *K. pneumoniae* ST258 and its bacteriophages**

17 **#Corresponding authors:** Carola Venturini, Centre for Infectious Diseases and  
18 Microbiology, The Westmead Institute for Medical Research, Westmead NSW 2145,

19 Australia. Tel.: 0061 2 86273415. Email: [carola.venturini@sydney.edu.au](mailto:carola.venturini@sydney.edu.au); Jonathan R Iredell

20 Centre for Infectious Diseases and Microbiology, The Westmead Institute for Medical  
21 Research, Westmead NSW 2145, Australia. Tel.: 0061 2 86273411. Email:

22 [jonathan.iredell@sydney.edu.au](mailto:jonathan.iredell@sydney.edu.au)

23

24 **Abstract**

25 Multidrug resistant carbapenemase-producing *Klebsiella pneumoniae* capable of causing  
26 severe disease in humans is classified as an urgent threat by health agencies worldwide.  
27 Bacteriophages are being actively explored as potential therapeutics against these multidrug  
28 resistant pathogens. We are currently developing bacteriophage therapy against carbapenem-  
29 resistant *K. pneumoniae* belonging to the genetically diverse, globally disseminated clonal  
30 group CG258. In an effort to define a robust experimental approach for effective selection of  
31 lytic viruses for therapy, we have fully characterized the bacterial genomes of 18 target  
32 strains, tested them against novel lytic bacteriophages, and generated phage-susceptibility  
33 profiles. The genomes of *K. pneumoniae* isolates carrying *bla*<sub>NDM</sub> and *bla*<sub>KPC</sub> were sequenced  
34 and isolates belonging to CG258 were selected for susceptibility testing using a panel of lytic  
35 bacteriophages (n=65). The local *K. pneumoniae* CG258 population was dominated by  
36 isolates belonging to sequence type ST258 clade 1 (86%). The primary differences between  
37 ST258 genomes were variations in the capsular locus (*cps*) and in prophage content. We  
38 showed that CG258-specific lytic phages primarily target the capsule, and that successful  
39 infection is blocked in many, post-adsorption, by immunity conferred by existing prophages.  
40 Five bacteriophages specifically active against *K. pneumoniae* ST258 clade 1 (n=5)  
41 belonging to the Caudovirales order were selected for further characterization. Our findings  
42 show that effective control of *K. pneumoniae* CG258 with phage will require mixes of  
43 diverse lytic viruses targeting all relevant *cps* variants and allowing for variable prophage  
44 content. These insights will facilitate identification and selection of therapeutic phage  
45 candidates against this serious pathogen.

46

47

48

49 **Importance**

50 Bacteriophages are natural agents that exclusively and selectively kill bacteria and have the  
51 potential to be useful in the treatment of multidrug resistant infections. *K. pneumoniae*  
52 CG258 is a main agent of life-threatening sepsis that is often resistant to last-line antibiotics.  
53 Our work highlights some key requirements for developing bacteriophage preparations  
54 targeting this pathogen. By defining the genomic profile of our clinical *K. pneumoniae*  
55 CG258 population and matching it with bacteriophage susceptibility patterns, we found that  
56 bacteriophage ability to lyse each strain correlates well with *K. pneumoniae* CG258 structural  
57 subtypes (capsule variants). This indicates that preparation of bacteriophage therapeutics  
58 targeting this pathogen should aim at including phages against each bacterial capsular  
59 subtype. This necessitates a detailed understanding of the diversity of circulating isolates in  
60 different geographical areas in order to make rational therapeutic choices.

61

## 62 **Introduction**

63 *Klebsiella pneumoniae* is an important ubiquitous Gram-negative species capable of causing  
64 disease in both humans and animals (1). The rise in recent decades of *K. pneumoniae* that are  
65 multi-drug resistant (MDR), including to last-line antibiotics such as carbapenems, has  
66 resulted in the classification of this species as an urgent threat to human health by health  
67 agencies worldwide and its recognition as an important antimicrobial resistance reservoir  
68 (2,3). Carbapenemase-producing (CP) MDR strains, carrying the *bla*<sub>KPC</sub> and *bla*<sub>NDM</sub> genes,  
69 can be asymptomatic residents of the human gut and a major cause of serious nosocomial  
70 infections worldwide associated with high morbidity and mortality (4-7).

71 The genetically diverse clonal group CG258, comprising sequence types ST258, ST11,  
72 ST512 and a few other SNP variants, is largely responsible for the global dissemination of  
73 MDR CP-*K. pneumoniae* (6,7). Population studies looking at the genomes of CG258 have  
74 shown that diversification within this clonal group is linked to a series of large-scale genomic  
75 rearrangements and an apparent high frequency of recombination, some of which result in  
76 switching or variation in the capsule polysaccharide-encoding (*cps*) locus (6-8). On the basis  
77 of this variation, the ST258 group can be subdivided into two separate lineages clade 1 and  
78 clade 2. ST258 clade 2 strains have been the main cause of disease outbreaks worldwide  
79 (7,9), while clade 1 uniquely predominated a recent Australian outbreak (9).

80 Alternative or adjuvant therapies to antibiotics against MDR pathogens are urgently needed  
81 (2). Naturally occurring lytic bacterial viruses (bacteriophages, phages) were recognised as  
82 effective therapeutic agents in the first decades of the 20th century, but were little valued by  
83 Western medicine during the antibiotic era (10). The rise in multidrug resistance, however,  
84 has renewed the interest in their potential for both decontamination and eradication of  
85 pathogens refractory to antibiotics. Lytic bacteriophages against problematic bacterial species  
86 can be readily isolated, but medical applicability is hindered by limited understanding of key

87 issues such as optimal clinical protocols, penetration, and resistance, as well as disappointing  
88 clinical trials using phage that have been associated with inconsistent protocols and poor  
89 targeting (10-12). Bacteriophages capable of lysing *K. pneumoniae*, including MDR strains  
90 have been described (13-15), with complete genomes for more than 80 full double-stranded  
91 (ds) DNA phages available in NCBI databases to date. However, no effective therapeutic  
92 product has yet reached the bedside.

93 We are currently exploring bacteriophage therapy against extended-spectrum- $\beta$ -lactamase  
94 (ESBL) producing *Enterobacteriaceae* isolated in Australia from humans with the aim of  
95 defining a robust experimental protocol for the rapid design of effective targeted phage  
96 preparations. Here, we present the bacteriophage susceptibility profiles of *K. pneumoniae*  
97 ST258 isolated in Australia and show their correlation with genomic variation within this  
98 clonal group. We also report the full genome sequence of five *K. pneumoniae* ST258-specific  
99 lytic phages (AmPh\_EK29, AmPh\_EK52, AmPh\_EK80, JIPh\_Kp122, JIPh\_Kp127) isolated  
100 from wastewater in Australia.

101

## 102 **Methods**

### 103 **Bacterial isolates**

104 In this study, we have fully characterized the bacterial genomes of ESBL *K. pneumoniae*  
105 CG258 strains from Australia (n=18, with n=16 CP-*K. pneumoniae*) and tested the infectivity  
106 of novel bacteriophages (n=65) selected from our existing libraries or isolated *de novo* from  
107 local environmental sources. All MDR *K. pneumoniae* isolates containing the carbapenem  
108 resistance genes commonly associated with CG258, *bla*<sub>NDM</sub> or *bla*<sub>KPC</sub> (16), in our extensive  
109 clinical collection were selected as potential target isolates for this study (Table 1).

110

111

**Table 1. *K. pneumoniae* isolates characterized in this study.**

| Name (JIE)* | Patient Identifier | State | Collection <sup>†</sup> | Carbapenemase encoding gene <sup>‡</sup> | Antibiotic resistance phenotype**                               | Reference |
|-------------|--------------------|-------|-------------------------|------------------------------------------|-----------------------------------------------------------------|-----------|
| 2487        | 1                  | Vic   | 2012                    | none                                     | AMK AMC AMP ATM CAZ CRO CIP SXT<br>GEN TZPi TIM TOB TMP         | (17)      |
| 2709        | 2                  | Vic   | 2012 (June 06)          | <i>bla<sub>KPC</sub></i>                 | AMK AMC AMP ATM FEP CAZ CRO CIP<br>SXT MEM MXF TZP TIM TOB TMP  | (16)      |
| 2713        | 3                  | Vic   | 2012                    | <i>bla<sub>NDM</sub></i>                 | AMK AMC AMP ATM FEP CAZ CRO CIP<br>SXT GEN MEMi TZP TIM TOB TMP | (17)      |
| 2733        | 4                  | NSW   | 2012                    | <i>bla<sub>KPC</sub></i>                 | AMK AMC AMP ATM FEP CAZ CRO CIP<br>SXT GENi MEM TZP TIM TOB TMP | (16)      |
| 2740        | 2                  | Vic   | 2012 (June 21)          | none                                     | AMK AMC AMP ATM FEP CAZ CRO CIP<br>SXT TZPi TIM TOB TMP         | (16)      |
| 2771        | 5                  | NSW   | 2012                    | <i>bla<sub>KPC</sub></i>                 | AMK AMC AMP ATM CAZ CRO CIP MEM<br>TZP TIM TOB TMPi             | (16)      |
| 2783        | 6                  | NSW   | 2010                    | <i>bla<sub>KPC</sub></i>                 | AMK AMC AMP ATM FEP CAZ CRO CIP<br>CST SXT MEM TZP TIM TOB TMP  | (16)      |
| 2793        | 7                  | WA    | 2012                    | <i>bla<sub>KPC</sub></i>                 | AMK AMC AMP ATM CAZ CRO CIP SXT<br>MEM TZP TIM TOB TMP          | (16)      |
| 3095        | 8                  | Vic   | 2012                    | <i>bla<sub>KPC</sub></i>                 | AMK AMC AMP ATM FEP CAZ CRO CIP<br>GENi MEM TZP TIM TOB TMPi    | (16)      |
| 4005        | 9                  | Vic   | 2014 (Jan 09)           | <i>bla<sub>KPC</sub></i>                 | AMK AMC AMP ATM FEP CAZ CRO CIP<br>GENi MEM TZP TIM TOB         | (16)      |
| 4019        | 9                  | Vic   | 2014 (Jan 31)           | <i>bla<sub>KPC</sub></i>                 | AMK AMC AMP ATM FEP CAZ CRO CIP<br>SXT MEM TZP TIM TOB TMP      | (16)      |
| 4020        | 10                 | Vic   | 2014                    | <i>bla<sub>KPC</sub></i>                 | AMK AMC AMP ATM FEP CAZ CRO CIP<br>GENi MEMi TZP TIM TOB        | (16)      |
| 4046        | 11                 | Vic   | 2014                    | <i>bla<sub>KPC</sub></i>                 | AMKi AMC AMP ATM FEP CAZ CRO CIP<br>MEM TZP TIM TOB             | (16)      |

*continues next page*

*Table 1 continued*

| Name<br>(JIE)* | Patient<br>Identifier | State | Collection <sup>†</sup> | Carbapenemase<br>encoding gene <sup>‡</sup> | Antibiotic resistance phenotype**                                               | Reference |
|----------------|-----------------------|-------|-------------------------|---------------------------------------------|---------------------------------------------------------------------------------|-----------|
| 4203           | 12                    | Vic   | 2014                    | <i>bla<sub>KPC</sub></i>                    | AMK AMC AMP ATM FEP CAZ CRO CIP<br>MEM TZP TIM TOB TMP                          | (16)      |
| 4282           | 13                    | Vic   | 2014                    | <i>bla<sub>KPC</sub></i>                    | AMC AMP ATM FEP CAZ CRO CIP SXT<br>GEN MEM <sub>i</sub> TZP TIM TOB TMP         | (16)      |
| 4455           | 14                    | NSW   | 2015                    | <i>bla<sub>KPC</sub></i>                    | AMK AMC AMP ATM FEP CAZ CRO CIP<br>SXT MEM TZP TIM TOB TMP                      | (16)      |
| 4626           | 16                    | NSW   | 2015                    | <i>bla<sub>KPC</sub></i>                    | AMK <sub>i</sub> AMC AMP ATM FEP CAZ CRO CIP<br>CST SXT GEN MEM TZP TIM TOB TMP | (16)      |
| 4660           | 17                    | NSW   | 2015                    | <i>bla<sub>KPC</sub></i>                    | AMK <sub>i</sub> AMC AMP ATM FEP CAZ CRO CIP<br>CST SXT GEN MEM TZP TIM TOB TMP | (16)      |

\*from JIE\_G1046886\_Iredell collection; <sup>†</sup>in brackets, month and day specified for isolates collected from the same patient; <sup>‡</sup>determined by diagnostic PCR screening at collection facility (ICPMR, Westmead Hospital, Westmead, NSW, Australia); \*\*determined by BD Phoenix™ (Becton Dickinson, Wokingham, Berkshire, UK) screening at collection facility. Cut-off values in accordance with the EUCAST system. i, intermediate. For isolate 2793, FEP susceptibility was not determined.

112

### 113 **CP-K. pneumoniae phenotypes**

#### 114 *Biofilm production*

115 Biofilm formation by growing bacteria in polypropylene microtitre plates was estimated by  
 116 crystal violet staining of adherent cells, following the protocol of O'Toole and Kolter (18)  
 117 with minor modifications. Briefly, overnight bacterial cultures in lysogeny broth (LB; Oxoid,  
 118 Basingstoke, UK) adjusted to OD<sub>600</sub> 0.4 were added (0.1 mL) to microtiter plate (Corning  
 119 Life Sciences, Corning, NY, USA) wells and grown overnight in a static incubator at 37°C.  
 120 Wells were carefully washed twice with RO water before addition of 0.1% crystal violet  
 121 (Sigma-Aldrich, MO, USA) (225 µL) and incubation at room temperature. Plates were gently  
 122 washed four times with RO water and dried at room temperature for at least 2 h. For

123 quantitation, 200  $\mu$ L of 100% ethanol was added to each well and left for 10-15 min. An  
124 aliquot (125  $\mu$ L) of the solubilized solution was then transferred to a new flat bottom  
125 microtiter dish and absorbance at 540 nm was measured in a Spectromax Vmax microplate  
126 reader (Biomolecular Devices, San Jose, CA, USA). Negative (LB only) and positive (ATCC  
127 27853 *P. aeruginosa*, a strong biofilm producer) controls were included on all plates.  
128 Experiments were performed in triplicate.

129

### 130 *Polysaccharide capsule production*

131 Total capsule production in *K. pneumoniae* CG258 was quantified according to previously  
132 described methods (19,20). Briefly, overnight bacterial cultures in Mueller-Hinton broth  
133 (Oxoid, Basingstoke, UK) were mixed with 1% Zwittergent 3-14 detergent (Millipore,  
134 Billerica, MA, USA) in 100 mM citric acid (pH 2.0) and incubated for 30 min at 50°C with  
135 occasional mixing. After pelleting the bacteria, 300  $\mu$ L of supernatant was mixed with  
136 absolute ethanol to a final concentration of 80% and left on ice for 30 min to allow for  
137 capsule precipitation. After centrifugation, the precipitates were allowed to dry and then  
138 resuspended in 100  $\mu$ L of DNase-free water (Lonza, Rockland, ME, USA) and kept at 4°C  
139 overnight. Capsule quantitation was assayed by measuring uronic acid content on ethanol-  
140 precipitated culture supernatants by addition of 1.2 mL of 12.5 mM tetraborate (Sigma-  
141 Aldrich, St. Louis, MO, USA) in concentrated sulphuric acid (Sigma-Aldrich, St. Louis, MO,  
142 USA), and detection (absorbance at 520 nm) using 0.15% m-hydroxydiphenyl (Sigma-  
143 Aldrich, St. Louis, MO, USA) in 0.5% NaOH (Amresco, Solon, OH, USA). Sodium  
144 hydroxide added to the tetraborate/sulphuric acid solution was used as the baseline for  
145 quantification. Capsule quantification was performed in triplicate for each bacterial strain.

146

147



148 *Lipopolysaccharide profiles*

149 Lipopolysaccharide (LPS) profiles of *K. pneumoniae* CG258 strains were analysed using  
150 sodium dodecyl sulphate polyacrylamide gel electrophoresis (SDS-PAGE) subsequent to  
151 proteinase K digestion of the proteins in whole cell lysates (21). Overnight bacterial cultures  
152 (100 µl) were pelleted and washed twice in saline. The final pellet was resuspended in 35 µl  
153 sterile saline. Pellets were treated with 20 µl 4x SDS reducing buffer (0.0625 M Tris-HCl, pH  
154 8.8, 10% glycerol, 2% SDS, 5% 2-b-mercaptoethanol, 0.0125% bromophenol blue) at 100°C  
155 for 10 min. Proteins were digested by addition of 15 µl 20 mg/ml proteinase K and incubation  
156 at 60°C for 1 h. Sample preparations were run on a 15% separating gel with a 4% stacking  
157 gel under reducing conditions using Tris-glycine running buffer (mini-PROTEAN system,  
158 Bio-Rad Laboratories, Hercules, CA, USA). Silver staining using sodium thiosulphate  
159 sensitisation and silver nitrate was performed according to established methods (22).

160

161 **Sequencing and analysis of bacterial genomes**

162 The genomes of selected MDR *K. pneumoniae* isolates were sequenced by Illumina NextSeq  
163 (paired-end; 2 x 150 bp). Bacterial DNA extraction was performed using the DNeasy Blood  
164 and Tissue DNA isolation kit (Qiagen, Hilden, Germany) to obtain high purity (OD<sub>260/280</sub> 1.8-  
165 2.0; OD<sub>260/230</sub> 1.8) preparations for sequencing. DNA libraries for whole genome sequencing  
166 (WGS) were prepared using the Nextera XT kit and sequencing was performed at the  
167 Australian Genome Research Facility (AGRF, Melbourne, Australia). *De novo* assembly of  
168 sequencing reads and simulated reads of NCBI reference genomes were performed as  
169 previously described (23), using our WGS analysis workflow based on publicly available  
170 tools including SPAdes 3.9.0 (24); Nullarbor 1.20 (25); Kleborate 0.2.0 (26) to confirm  
171 identity (*in silico* MLST), virulence and antibiotic resistance genotypes. A maximum-  
172 likelihood recombination-free phylogenetic tree was computed using RAxML 8.2.4 (27) and

173 Gubbins 2.2.0 (28), using a reference-based core genome alignment as an input. The publicly  
174 available genome sequences of five representative CG258 strains were also added for  
175 comparative purposes: AUSMDU00008079, used as mapping reference (CP022691);  
176 HS11286 (CP003200); NJST258-1 (CP006923); Kb140 (AQROD000000000); and VA360  
177 (ANGI000000000). The pangenome was determined using Roary version 3.11.0 (29) and used  
178 to classify regions of differences across the strain dataset, based on their contiguity and  
179 functional categories of the genes encoded. Kleborate 0.2.0 (26) was used to perform capsule  
180 typing, O antigen (LPS) serotyping and siderophore typing. Plasmid replicon identification  
181 and typing was performed using PlasmidFinder and pMLST implemented in BAP (30).  
182 Prophage-associated contigs were annotated using PHASTER (31). Further *cps* locus  
183 comparative analysis was performed using EasyFig (32) and Geneious v9.1  
184 (<https://www.geneious.com>). Gap closure between separate contigs in the capsular locus was  
185 achieved by PCR amplification and Sanger sequencing of purified linkage amplicons (AGRF,  
186 Melbourne, Australia).

187

#### 188 *bla<sub>KPC</sub>* genomic context

189 To confirm plasmid content and genomic context of the *bla<sub>KPC</sub>* gene in target ST258 (n=16)  
190 isolates, we performed Pulse Field Gel Electrophoresis (PFGE) on S1 nuclease (Promega,  
191 Madison, WI, USA) digested DNA, as before (33,34), and Southern hybridization with  
192 *bla<sub>KPC</sub>* and *rep* IncFII<sub>K</sub> DIG-labelled probes (16) prepared using published primers (35,36)  
193 and the PCR DIG Probe Synthesis Kit (Roche, Mannheim, Germany) following  
194 manufacturer's instructions. Images were obtained on a ChemiDoc™ MP System (Bio-Rad  
195 Laboratories, Richmond, CA, USA).

196

197 ***De novo* isolation of CP-*K. pneumoniae* specific bacteriophages**

198 Bacteriophages against target *K. pneumoniae* CG258 were isolated from sewage and  
199 wastewater samples collected in the Greater Sydney District (Sydney, NSW, Australia).  
200 Specimens were clarified by centrifugation and filtration through a 0.22 µm filter. Aliquots of  
201 environmental filtrates were then incubated with target *K. pneumoniae* isolates overnight.  
202 Bacteriophages were selected from single plaques in double-layer agar assays and purified  
203 through three rounds of plating (37). High-titre stocks were prepared by propagating phage  
204 over several double-layer plates washed in SM buffer (50 mM Tris-HCl, 8 mM MgSO<sub>4</sub>, 100  
205 mM NaCl, pH 7.4) and filtered through a 0.22 µm filter. The concentration of phage-forming  
206 units (PFU) per ml was determined by spotting 10 µl of ten-fold serial dilutions onto a  
207 double-layer of the target bacteria (37). High-titre ( $\geq 10^9$  PFU/mL) phage stocks were stored  
208 at 4°C.

209

210 **Bacteriophage host range**

211 The identified CG258 *K. pneumoniae* strains were tested against phages (n=65) selected from  
212 our extensive library or isolated *de novo* against one of the target isolates. Bacteriophage host  
213 range was determined by measuring the efficiency of plating (EOP) for each phage-bacteria  
214 combination. Ten-fold serial dilutions (10 µl) were spotted onto a double-layer of the target  
215 bacteria and compared to the original isolation host (37). *Escherichia coli*, *Enterococcus*  
216 *faecium*, *Pseudomonas aeruginosa*, *Staphylococcus aureus* and *Staphylococcus*  
217 *pseudintermedius* were used as cross-species controls. In order to further test bacteriophage  
218 specificity, we also blind tested the host ranges of three phages with unique specificities  
219 (AmPh\_EK52, AmPh\_EK38 and JIPh\_Kp122) on a set of CP-*K. pneumoniae* isolates from  
220 Europe (n=48) to determine their predictive diagnostic value linked to *K. pneumoniae*  
221 sequence or capsule type. Bacteriophage activity against each strain was scored as: 1. ‘full

222 activity' for presence of clear plaques at highest dilution; 2. 'poor activity' for presence of  
223 turbid plaques, or isolated bacterial colonies within clearings, or EOP three or more log<sub>10</sub>  
224 lower than that of the original host; 3. 'partial activity' for evidence of clearing in bacterial  
225 lawn, but absence of distinct plaques; 4. 'negative' for very faint, difficult to observe,  
226 clearing or absence of any visible plaques or clearing zones in the bacterial lawn.

227

## 228 **Bacteriophage characterization**

### 229 *Genome sequencing*

230 Bacteriophages (n=5) that specifically lysed *K. pneumoniae* ST258 clade 1 with different host  
231 range profiles were selected for further characterization as potential therapeutic candidates.  
232 Bacteriophage DNA was extracted using the Wizard DNA Clean-Up System (Promega,  
233 Madison, WI, USA) and used for whole genome sequencing (WGS) (Nextera XT kit;  
234 Illumina NextSeq, paired-end, 2 x 150 bp). Briefly, total DNA concentration was quantified  
235 using Quant-it PicoGreen dsDNA Assay Kit (Invitrogen, Carlsbad, CA, USA) and 1 ng/μl of  
236 DNA was used to prepare DNA libraries using the Nextera XT Library Preparation Kit and  
237 Nextera XT v2 Indexes (Illumina, San Diego, CA, USA). Multiplexed libraries were  
238 sequenced using paired end 150 bp chemistry on the NextSeq 500 NCS v2.0 (Illumina). Error  
239 rates were calculated using PhiX Sequencing Control v3 for each run. De-multiplexing and  
240 FastQC generation was performed with default settings using BaseSpace (Illumina).  
241 Bacteriophage genomes were assembled using our in-house genomic pipeline and annotated  
242 using RAST-tk (38). The absence of lysogeny modules, virulence and resistance determinants  
243 was determined using our WGS analysis workflow (as for bacterial genomes) and PHASTER  
244 (31). Genome comparisons with best database (GenBank, NCBI) matches were obtained  
245 using EasyFig (32). PFGE of intact viral particles was performed to confirm relative size  
246 (Chef Mapper System, Bio-Rad Laboratories, Hercules, CA, USA).

## 247 *Imaging of bacteriophages*

248 Bacteriophage preparations were dialysed against 0.1 M ammonium acetate in dialysis  
249 cassettes with a 10,000 membrane molecular weight cut-off (Pierce Biotechnology,  
250 Rockford, IL, USA), negatively stained with 2% uranyl acetate and visualised using  
251 transmission electron microscopy (TEM) (37). TEM was conducted at the Westmead  
252 Electron Microscopy Facility (Westmead, Australia) on a Philips CM120 BioTWIN  
253 transmission electron microscope at 100kV. Images were recorded with a SIS Morada digital  
254 camera using iTEM software (Olympus Soft Imaging Solutions GmbH, Munster, Germany).  
255 Bacteriophage morphology and related taxonomic assignment were confirmed following the  
256 guidelines set by the International Committee on Taxonomy of Viruses  
257 (<http://www.ictvonline.org/>; 39).

258

## 259 *Phage stability*

260 Phage stability in SM buffer was determined by measuring the EOP after incubation at  
261 different temperatures (21°C for 24 h, 21°C for 7 days, 37°C for 24 h, 4°C for >1 month, and  
262 4°C for >1 month with chloroform) and at different pH levels (pH 3, 6, 7, and 8; 4 h at room  
263 temperature). Rate of adsorption and one-step growth curves (latent period and burst size)  
264 were calculated according to established protocols (37).

265

## 266 **Results**

### 267 ***CP-K. pneumoniae* population**

268 From a total of 21 isolates sequenced, 18 ESBL *K. pneumoniae* belonged to CG258 (S1  
269 Table). This set contained two ST11 representatives, one ST512 (single locus variant of  
270 ST258 clade 2) (7), one ST1199 (single SNP variant of ST258 clade 1) (40), and 14 ST258  
271 strains, segregated further into two distinct lineages, known as clade 1 (n=13) and clade 2

272 (n=2) and distinguished by approx. 40 non-recombinant core SNPs (Fig 1). Strains belonging  
273 to clade 1 dominated this population (86%), reflecting the epidemiology of a recent  
274 Australian outbreak (9). Inspection of the most common *K. pneumoniae* virulence-associated  
275 mobile genetic element, ICE*Kp*, revealed that all strains belonging to ST11 carried an  
276 ICE*Kp3* associated with a yersiniabactin operon *ybt* 9, while all ST258 and the ST1199 strain  
277 carried an ICE*Kp2* associated with a yersiniabactin operon *ybt* 13, a combination usually only  
278 found in clade 1 isolates (Fig. 1) (clade 2 isolates most commonly being associated with  
279 ICE*Kp10* with *ybt* 17) (41).

280

### 281 **CP-*K. pneumoniae* CG258 bacteriophage susceptibility**

282 Screening for bacteriophage susceptibility identified at least one phage with strong activity  
283 against each strain of CP-*K. pneumoniae* CG258, with potential therapeutic value (Fig. 2). A  
284 correlation pattern between specific regions of differences (RODs) and bacteriophage  
285 susceptibility was evident in our dataset (Fig.2). Phage host range profiles largely grouped  
286 according to capsular types, KL15-1 (ST11), KL106-D1 (ST258 clade 1) and KL107 (ST258  
287 clade 2 and ST512) each presenting unique patterns of phage susceptibility with few  
288 examples of cross-reactivity. Phage AmPh\_EK29 was able to lyse both a subset of clade 1  
289 isolates (KL106-D1 and D2) and JIE2793 (ST512; KL107), while phages JIPh\_Kp122 and  
290 JIPh\_Kp127 had preferential activity against few specific clade 1 isolates (Fig. 2).

291 Within the clade 1 set, this capsule-specificity of the phage tested was further confirmed by  
292 the resistance to lysis by the capsular variant isolates JIE2783 and JIE4282 (see below) which  
293 were resistant to the majority of the bacteriophages capable of lysing other clade 1 strains. *K.*  
294 *pneumoniae* phages AmPh\_EK52 and JIPh\_130 were effective in clearing most CP-*K.*  
295 *pneumoniae* ST258 clade 1 specifically, except for the ones carrying capsular variants. There

296 was no cross-activity of any of these clade-specific phages against any of the control species  
297 tested (*E. coli*, *E. faecium*, *P. aeruginosa*, *S. aureus* or *S. pseudintermedius*).

298

### 299 **ESBL *K. pneumoniae* CG258 variable accessory genome**

300 A comprehensive analysis of the pan-genome using Roary showed that the CG258 accessory  
301 genome was composed of 1,682 accessory genes, which could be further classified into  
302 discrete RODs (regions of difference) based on their function and contiguity as follows: 33  
303 capsule-associated genes, 334 phage-related genes, 622 plasmid-related genes, 328 RODs-  
304 associated genes, and 365 other genes that could not be assigned unambiguously to the  
305 aforementioned categories (ROD were numbered and are summarised in S2 Table). The  
306 presence-absence profile of these RODs appeared to reflect the ST and/or clade of the  
307 isolates, in particular for prophage- and plasmid-related regions (Fig. 2ABD; S2 Table).  
308 Notwithstanding this, there was a substantial degree of intra-clade variation within the ST258  
309 clade 1 isolates in the RODs corresponding to the *cps* polysaccharide capsule encoding locus,  
310 plasmid content and other RODs (Fig. 2ABD; S2 Table).

311

### 312 *Polysaccharide capsule synthesis locus*

313 Bioinformatic analysis of the genomic region between the *galF* and *ugd* genes revealed  
314 distinct capsular types within the same ST, with KL15 and KL103 found in ST11 strains, and  
315 KL106 and KL107 found in ST258 clade 1 and 2, respectively. The *cps* locus is a well-  
316 known recombination hot-spot in *K. pneumoniae* and further inspection of our clade 1  
317 isolates revealed the presence of three variants of the previously described KL106-D1  
318 arrangement (40,42) (Fig. 2; Fig. 3a). Variants were due to insertion of IS*Kpn26* (IS5 family)  
319 in two different locations within the *cps* locus: (i) within the *wcaJ* gene (KL106-D2 in  
320 JIE2783 and KL106-D4 in JIE4282) and (ii) within the acyltransferase encoding gene

321 (KL106-D3 found in JIE4005, JIE4019, and JIE4020) (Fig. 3a). All insertions caused the  
322 interruption of open reading frames producing characteristic 4 bp duplications (Fig. 3a).  
323 Sequences representative of the three new *cps* locus variants were deposited in GenBank.  
324 Capsule production was significantly different among the CP-*K. pneumoniae* strains  
325 (ANOVA,  $p < 0.001$ ) (Fig. 3b). Production was significantly decreased in JIE2783 and  
326 JIE4282 (capsular variants KL106-D2 and KL106-D4 respectively), while it appeared  
327 significantly higher in JIE3095 (Fisher's protected LSD,  $p < 0.05$ ), though in this latter strain  
328 no sequence variation in the capsule encoding locus was identified.

329 In our set of strains, an evident association was observed between bacteriophage  
330 susceptibility profiles and capsular locus variants (Fig. 2) with very few of the tested phage  
331 (4/65; ~ 6%) showing any cross-clade specificity. This correlation between capsule type and  
332 phage susceptibility held when a clade 1-specific (KL106) (AmPh\_EK52), a clade 2-specific  
333 (KL107) (AmPh\_EK38) and a phage with inter-clade range (JIPh\_Kp122) were blind-tested  
334 on a larger panel (n=48) of CP-*K. pneumoniae* isolates from Europe (S3 Table).

335

#### 336 *Other cell surface structures*

337 In contrast to the variable *cps* locus structure, gene content and arrangement in the LPS  
338 encoding loci was well conserved in our isolates. Accordingly, lipopolysaccharide profiles  
339 from silver staining showed a high degree of homogeneity with no significant differences in  
340 the O antigens of the short, long or intermediate chains (S1 Fig.). The lipid A component of  
341 JIE4282 differed in size from all other *K. pneumoniae* CG258 (S1 Fig.). According to  
342 Kleborate (26), JIE4282 is missing the *wbbM* gene encoding a glycosyltransferase required  
343 for *d*-galactan I biosynthesis (43). Of note, although JIE2793 (ST512) is missing one of the  
344 hypothetical proteins (*glmA*) in the O antigen operon (O2v2 type), this had no observable  
345 impact on the observed LPS profile.



346 Biofilm production levels also differed (unbalanced ANOVA,  $p < 0.001$ ) and were found to  
347 be significantly higher in JIE2793, JIE3095 and JIE4282 compared to all others (Fisher's  
348 protected LSD,  $p < 0.05$ ) (S2 Fig.). Variable levels could be attributable to a number of  
349 factors, including variations associated with fimbrial genes. For instance, the *ecp* fimbrial  
350 operon associated with ROD-6 is missing in JIE4005, JIE4019, and JIE4020 (all KL106-D3)  
351 and in JIE4046 (S2 Table). JIE3095 also harbours a large 124 kb recombinant region which  
352 encompasses some fimbrial proteins. Limited capsule production (*e.g.* JIE4282) and  
353 expression of O-antigen variants (*e.g.* JIE2793) could also affect adhesion necessary for  
354 biofilm establishment. These variations in cell surface structures could be implicated with  
355 bacteriophage susceptibility, but no immediate correlation with phage host range was actually  
356 observed.

357

### 358 *Prophages*

359 The prophage content of clade 1 isolates was also variable. For example, a common prophage  
360 found in all other clade 1 representatives (designated phage 1 in S2 Table, with homology to  
361 viruses of the *Myoviridae* family) was truncated in JIE3095, missing most of the tail  
362 assembly module (Fig. 2). In JIE4005, 4019, and 4020 an additional unique prophage  
363 sequence was identified (Fig. 2; S2 Table). Based on prophage profile, clade 1 isolates could  
364 be subdivided into groups with broad association with bacteriophage susceptibility (Fig. 2).

365

### 366 *Plasmids*

367 All *K. pneumoniae* were MDR, and all ST258 isolates with the exception of JIE2740 carried  
368 the *bla*<sub>KPC</sub> gene (Table 2; S4 Table). The overall plasmid signature for each ST258 clade was  
369 unique and remarkably uniform (Table 2; S3 Fig.). As expected (8,16), the *bla*<sub>KPC</sub> allele 2  
370 (*bla*<sub>KPC-2</sub>) was exclusively associated with ST258 clade 1, whilst *bla*<sub>KPC-3</sub> was associated with

371 clade 2 isolates and the closely related ST512 strain (Table 2). These genes were found  
 372 exclusively on large (>20 kb) plasmids and co-localized by Southern hybridization with the  
 373 IncFIIK *rep* gene (Table 2; S3 Fig.). All isolates carried multiple genes conferring extended-  
 374 spectrum  $\beta$ -lactam resistance (ESBL) other than *bla<sub>KPC</sub>* (S4 Table). Antibiotic resistance  
 375 genotypes determined by WGS analysis accounted for all resistance phenotypes determined  
 376 by standard clinical screening (S4 Table).  
 377

**Table 2. Plasmid content in sequenced *K. pneumoniae* CG258 isolates.\***

| Isolate <sup>^</sup> | ST258<br>clade | <i>bla<sub>KPC</sub></i><br>allele | Plasmid replicons <sup>†</sup>             | Plasmid sizes (kb)** |                     |
|----------------------|----------------|------------------------------------|--------------------------------------------|----------------------|---------------------|
|                      |                |                                    |                                            | 20-100               | >100                |
| 2487                 | na (ST11)      | none                               | IncFIIK IncF-like ColE-like                | nd                   | nd                  |
| 2713                 | na (ST11)      | none                               | IncFIIK ColE-like                          | nd                   | nd                  |
| <b>2709</b>          | 1              | 2                                  | IncFIIK IncFIB-pKpQil-like IncX3 ColE-like | none                 | <u>242.5; 104.5</u> |
| 2733                 | 1              | 2                                  | IncFIIK IncX3 ColE-like                    | <b>43</b>            | <u>194</u>          |
| <b>2740</b>          | 1              | none                               | IncFIIK IncX3 ColE-like                    | 41                   | <u>194</u>          |
| 2771                 | 1              | 2                                  | IncFIIK IncFIB-pKpQil-like IncX3 ColE-like | 41                   | <u>104.5</u>        |
| 2783                 | 1              | 2                                  | IncFIIK IncFIB-pKpQil-like IncX3 ColE-like | <b>43</b>            | <u>194; 104.5</u>   |
| 3095                 | 1              | 2                                  | IncFIIK IncX3 ColE-like                    | 41                   | <u>165</u>          |
| <b>4005</b>          | 1              | 2                                  | IncFIIK IncX3 ColE-like                    | 43                   | <u>160.5</u>        |
| <b>4019</b>          | 1              | 2                                  | IncFIIK IncF IncX3 ColE-like               | 43                   | <u>160.5</u> ; 150  |
| 4020                 | 1              | 2                                  | IncFIIK IncX3 ColE-like                    | 43                   | <u>160.5</u>        |
| 4046                 | 1              | 2                                  | IncFIIK IncX3 ColE-like                    | 41                   | <u>160.5</u>        |
| 4203                 | 1              | 2                                  | IncFIIK IncX3 ColE-like                    | 41                   | <u>194; 104.5</u>   |
| 4282                 | 1              | 2                                  | IncFIIK IncFIB-pKpQil-like IncX3 ColE-like | 41                   | <u>200; 110</u>     |
| 4455                 | 1              | 2                                  | IncFIIK IncFIB-pKpQil-like IncX3 ColE-like | 43                   | <u>160.5</u>        |
| 2793                 | na (ST512)     | 3                                  | IncFIIK IncN ColE-like                     | 58                   | <b>208</b>          |

*continues next page*

*Table 2 continued*

| Isolate <sup>^</sup> | ST258 clade | <i>bla</i> <sub>KPC</sub> allele | Plasmid replicons <sup>†</sup> | Plasmid sizes (kb) <sup>**</sup> |                  |
|----------------------|-------------|----------------------------------|--------------------------------|----------------------------------|------------------|
|                      |             |                                  |                                | 20-100                           | >100             |
| 4626                 | 2           | 3                                | IncFIIK IncR IncX3 ColE-like   | <b>43</b>                        | <u>208</u> ; 121 |
| 4660                 | 2           | 3                                | IncFIIK IncR IncX3 ColE-like   | <b>43</b>                        | <u>208</u> ; 121 |

\*Data obtained from WGS analysis except where otherwise specified. <sup>^</sup>, in bold isolates from same patient; <sup>†</sup>, based on PlasmidFinder scheme implemented in BAP (30); <sup>\*\*</sup>, approximate sizes determined by S1-PFGE; nd, not determined. In bold, plasmids co-localizing with the *bla*<sub>KPC</sub> gene as identified by Southern blot hybridization. Underline, IncFIIK replicons detected in Southern blot hybridization.

378

### 379 **Bacteriophage characterization**

380 Among the tested phages, we identified five unique double-stranded DNA bacteriophages  
 381 AmPh\_EK29, AmPh\_EK52, AmPh\_EK80, JIPh\_Kp122, and JIPh\_Kp127 that selectively  
 382 target CP-*K. pneumoniae* ST258 clade 1 isolates, some of which may have therapeutic  
 383 potential (Table 3; Table 4). WGS of purified viral DNA produced 11,340 to 5,049,732 reads  
 384 that *de novo* assembled into one contig in all instances (S1 Table). Bacteriophage genomes  
 385 size varied between 40.7 and 169.3 kb and GC content was lower than 50% (i.e. host  
 386 genome) in all except for AmPh\_EK52 (GC% 52.9) (Table 4; Fig. 4). No lysogeny or  
 387 virulence associated genes were identified in these bacteriophage sequences, consistent with  
 388 their lytic nature and thus indicating their suitability for therapeutic use (Fig. 4). The high  
 389 degree of sequence similarity (>95%) to characterized *K. pneumoniae*-specific phage in the  
 390 NCBI database and TEM imaging indicated that each selected phage belonged to the order  
 391 Caudovirales (Table 4; Fig. 4).

392 AmPh\_EK29 and JIPh\_Kp122 (*Myoviridae*-like), presented a prolate head (approx. 80 by  
 393 100 nm) and contractile tale (100 nm) (Table 4; Fig. 4a and 4d). AmPh\_EK52 resembled  
 394 *Podoviridae* phages for having a small thick non-contractile tail (approx. 20 nm long) and  
 395 close homology to other members of this family including genome size of about 40 kb and

396 absence of t-RNAs in its genome (Table 4; Fig. 4b). JIPh\_Kp127 and AmPh\_EK80 were both  
397 T5-like *Siphoviridae* viruses with long thin non-contractile tails (Table 4; Fig. 4c and 4e).  
398 Screening of entries in the NCBI database by BLASTn identified close relatives of these  
399 bacteriophages but no identical sequences (Table 4), and in genome comparisons with best  
400 matching GenBank entries the modular structure and order were preserved in all cases, with  
401 the main regions of difference found in tail or tail-associated open reading frames (Fig. 4).  
402 All five bacteriophages efficiently lysed target bacteria *in vitro* at high titre and in  
403 combination captured the entire ST258 clade 1 subset (Table 3). However, host ranges were  
404 unique for each phage. AmPh\_EK80, JIPh\_Kp122 and JIPh\_Kp127 showed limited activity  
405 toward ST258 strains, bar a few specific targets that lysed at high titre, and often were  
406 associated with confluent lysis zones, indicating the possibility of lysis from without or  
407 abortive lysis (Table 3). All phages were highly stable in SM buffer maintaining high titre at  
408 a range of temperatures (4°C for >1 month; 21°C for one week; 37°C for 24 h) and pH levels  
409 (pH 3, 6, 7 and 8 for 4 h). Exposure to chloroform at 4°C decreased the stability of  
410 AmPh\_EK29 by 2-3 orders of magnitude, but had no effect on the stability of the remaining  
411 four phages. One-step growth curves revealed latent periods of 80-250 min and burst sizes  
412 between 12 and 500 pfu/cell (Table 4; S4 Fig.). Growth curves for AmPh\_EK80 and  
413 JIPh\_Kp127 were comparable. Phage JIPh\_Kp122 had the shortest latent time (80 min),  
414 while AmPh\_EK52 had the shortest burst time (30 min).

415

416 **Accession number(s)** The Illumina sequencing datasets of all *K. pneumoniae* isolates  
417 obtained in this work were deposited in SRA (NCBI) database under Bioproject  
418 PRJNA529495. The *cps* locus variants were deposited in the GenBank database (NCBI)  
419 under accessions: XXXXX for KL106-D2 (JIE2783), XXXXX for KL106-D3 (JIE4019), and  
420 XXXXX for KL106-D4 (JIE4282). The complete annotated genomes of *K. pneumoniae*

421 phages AmPh\_EK29, AmPh\_EK52, AmPh\_EK80, JIPh\_Kp122, and JIPh\_Kp127 were also  
422 deposited in the GenBank database (NCBI) under accession numbers XXXXX, XXXXX,  
423 XXXXX, XXXXX and XXXXX, respectively.

424

## 425 **Discussion**

426 The increasing challenges posed by the rise of antibiotic resistance in human pathogens have  
427 revitalized interest in the use of bacteriophage for the treatment of bacterial infections (10-  
428 12). Among MDR pathogens, CP-*K. pneumoniae* is a serious clinical concern, as both gut  
429 colonizer and agent of severe sepsis when invading sterile body sites (1,44). In this study,  
430 ST258 isolates were predominant in the local clinical CP-*K. pneumoniae* population, with  
431 overrepresentation of ST258 clade 1 (KL106-D1), reflecting the epidemiology of a recent  
432 local outbreak (9). The incidence of *bla*<sub>KPC</sub> in Australia has been rather limited when  
433 compared to its dissemination in other countries (16). The Western Sydney Health district is  
434 one of the largest in the country and we could only identify 0.2% CP-*K. pneumoniae* with  
435 *bla*<sub>KPC</sub> over the past six years in its diagnostic enterobacterial collection (JIE), which is in line  
436 with reported national frequencies (45). However, as our own data confirms, tracking of these  
437 pathogens remains paramount due to the consistent association of multidrug resistance with  
438 mobilizable elements (16,36).

439 In the *K. pneumoniae* genome, the *cps* locus, encoding the capsular polysaccharide outer  
440 layer, is a recognized recombination hotspot, responsible for the diversification of clonal  
441 lineages, particularly within the CG258 group (6-8), and over 100 capsular types have been  
442 identified in this species (42,46). The capsule is a complex structure of repeating sugar  
443 subunits that protects the cell from external threats (including phage attack) and enhances *K.*  
444 *pneumoniae* virulence, being implicated in resistance to host defence mechanisms, immune  
445 evasion, adherence, and biofilm formation (47). *K. pneumoniae* types produce capsule in

446 varying degrees and hypermucoviscosity (excessive capsule production) has been linked to  
447 increased virulence (47). In our study, we identified three novel capsular variants in ST258  
448 clade 1 due to ISKpn26 insertion in the *cps* locus, and responsible for the intra-clade variation  
449 in our population which correlated remarkably well with reduced host range for many of the  
450 clade 1 infecting phages. ISKpn26 has been recently implicated in unique recombination  
451 events in MDR *K. pneumoniae* (48) and may be worthwhile tracking. Two of the variants  
452 (D2 and D4), where the IS interrupted the *wcaJ* gene, were found in isolates with reduced  
453 capsule production in accordance with studies demonstrating that disruption of this gene has  
454 a detrimental effect on capsule content (46,49). The positive correlation between phage  
455 resistance and reduced virulence has been previously observed in the adaptive interplay  
456 between *Klebsiella* and its bacteriophages, with the isolation of less virulent bacterial  
457 mutants, and may be an expected trade-off in their evolutionary arms race (50). It is therefore  
458 not surprising that co-evolution of specific phage with this host resulted in the narrow host  
459 ranges observed in this study, a characteristic that could be exploited for therapeutic  
460 purposes, as specific recognition by phage receptors (tail spikes) of complementary anti-  
461 receptors on the host cell surface is at the core of phage lytic activity (51,52).

462 Comparative analysis of genomic data and bacteriophage susceptibility profiles showed a  
463 marked association between the host range of most of the tested viruses with capsular type.  
464 Very few examples of cross-reactivity were observed among *K. pneumoniae* CG258 phages  
465 that lysed different capsular types with high specificity. Host range was further restricted  
466 within clades, i.e. no phage lysing ST258 clade 1 effectively also infected clade 2 isolates,  
467 and *vice versa*. Phage AmPh\_EK29 as a notable exception lysed only a subset of ST258 clade  
468 1 strains (capsular type KL106), but also the ST512 representative isolate (capsular type  
469 KL107), indicative of a unique receptor specificity for this virus. JIPh\_Kp122 and  
470 JIPh\_Kp127 also showed broader spectra beyond capsular type, but lysed ST258 isolates

471 overall with poor efficiency, with evidence of abortive or passive lysis (53), perhaps limiting  
472 their therapeutic value. Capsule-targeting bacteriophages have been shown to be effective  
473 against *K. pneumoniae* of different capsular type *in vitro* and *in vivo*, along with  
474 depolymerases, which are enzymes produced by phages that cleave glycosidic bonds  
475 disrupting capsule integrity (54,55). Depolymerase activity was originally shown to be  
476 random, however recent work demonstrated depolymerase specificity toward certain K types  
477 (56,57), an indication that enzymatic degradation may be causing the patterns of lytic activity  
478 observed in our study. We did not find immediate evidence that all our phage encoded these  
479 proteins and, for the ones for which a depolymerase-related phenotype was observed, we  
480 could not readily identify the putative coding regions, except for AmPh\_EK52.

481 Even though the attachment mechanisms or receptor binding sites for any of the tested phages  
482 were not investigated, host range matching with genomic data allowed for the selection of a  
483 number of viruses with unique characteristics that could be further examined for therapeutic  
484 applications. All the phages sequenced in this work were highly homologous to previously  
485 characterized lytic viruses shown to be effective against specific *K. pneumoniae* STs.  
486 However, none matched the specificities (host ranges) against ST258 of our viruses.  
487 Comparative analysis of phage genomes identified preferential loci of variability, mostly  
488 related with tail fibres or tail-associated genes, likely the primary receptors responsible for  
489 each specific host range. The different but complementary host ranges of the phages  
490 characterized here may indicate differences in receptor specificity (see AmPh\_EK52 versus  
491 JIPh\_Kp122 for example) and could lead to successful therapeutic combinations (high  
492 activity, poor resistance development).

493 The complex dynamic interactions of phages and their hosts and the co-evolution  
494 mechanisms at play have undermined the direct prediction of phage susceptibility from host  
495 genomics, even when dealing with clonal populations. Though capsular variation was at the

496 core of the divergence of isolates within this subset, fine genomic diversity in our ST258  
497 clade 1 strains was also associated with other elements such as prophage content, porin  
498 defects, and plasmid content. The ST258 clade 1 subset in this study roughly divided into  
499 three subgroups based on prophage profile, further evidence of the genome plasticity in these  
500 species (58). Prophage content was likely implicated in resistance to some of the tested  
501 phages (e.g. AmPh\_EK29) and must also be considered when designing optimal therapeutic  
502 mixes. Variability in the lipid A core of the LPS surface layer could also contribute phage  
503 resistance in JIE4282, as this is generally highly conserved within *K. pneumoniae*, making it  
504 an important determinant for host receptor recognition (51,52). Other differences (lack of  
505 fimbrial locus in JIE4046, different plasmid content (JIE4005, 4019 and 4020), *ompK36*  
506 variants etc.) seemed not to directly impact the susceptibility patterns to most of the tested  
507 phages. However, these all have the potential to affect viral host range and synergy when  
508 phages are to be used for therapeutic cocktails preparation (51,52).

509 The unique relationship between *K. pneumoniae* and its phages highlighted in this study is  
510 very important for future progress in therapeutic applications specifically targeting ST258  
511 isolates or other hypervirulent types Better bioinformatic tools and larger well characterized  
512 microbial collections may allow for better definition of predictive algorithms. As we have  
513 demonstrated here capsular variation is critical to phage susceptibility and must be considered  
514 when designing effective therapeutics against this pathogen.

515



516 **REFERENCES**

- 517 [1] Podschun, R. and U. Ullmann (1998). *Klebsiella* spp. as nosocomial pathogens:  
518 epidemiology, taxonomy, typing methods, and pathogenicity factors. *Clinical microbiology*  
519 *reviews* 11(4): 589-603.
- 520 [2] World Health Organization. Antimicrobial Resistance Global Report on Surveillance:  
521 2014 Summary; WHO: Geneva, Switzerland, 2014.
- 522 [3] Centers for Disease C. Prevention Vital signs: carbapenem-resistant *Enterobacteriaceae*.  
523 (2013). *MMWR Morb Mortal Wkly Rep* 62:165–70.
- 524 [4] Nordmann, P., et al. (2009). The real threat of *Klebsiella pneumoniae* carbapenemase-  
525 producing bacteria. *The Lancet Infectious Diseases* 9(4): 228-236.
- 526 [5] Pitout, J. D. D., et al. (2015). Carbapenemase-producing *Klebsiella pneumoniae*, a key  
527 pathogen set for global nosocomial dominance. *Antimicrobial agents and chemotherapy*  
528 59(10): 5873-5884.
- 529 [6] Deleo, F. R., et al. (2014). Molecular dissection of the evolution of carbapenem-resistant  
530 multilocus sequence type 258 *Klebsiella pneumoniae*. *Proceedings of the National Academy*  
531 *of Sciences* 111(13): 4988-4993.
- 532 [7] Holt, K. E., et al. (2015). Genomic analysis of diversity, population structure, virulence,  
533 and antimicrobial resistance in *Klebsiella pneumoniae*, an urgent threat to public health.  
534 *Proceedings of the National Academy of Sciences of the United States of America* 112(27):  
535 E3574-E3581.
- 536 [8] Wyres, K. L., et al. (2015). Extensive Capsule Locus Variation and Large-Scale Genomic  
537 Recombination within the *Klebsiella pneumoniae* Clonal Group 258. *Genome biology and*  
538 *evolution* 7(5): 1267-1279.

- 539 [9] Kwong, J. C., et al. (2018). Translating genomics into practice for real-time surveillance  
540 and response to carbapenemase-producing *Enterobacteriaceae*: evidence from a complex  
541 multi-institutional KPC outbreak." PeerJ 6: e4210.
- 542 [10] Abedon, S. T., et al. (2011). Phage treatment of human infections. Bacteriophage 1(2):  
543 66-85.
- 544 [11] Chan, B. K., et al. (2013). Phage cocktails and the future of phage therapy. Future  
545 Microbiology 8(6): 769-783.
- 546 [12] Ly-Chatain, M. H. (2014). The factors affecting effectiveness of treatment in phages  
547 therapy. Frontiers in Microbiology 5: 51-51.
- 548 [13] Keşik-Szeloch, A., et al. (2013). Characterising the biology of novel lytic bacteriophages  
549 infecting multidrug resistant *Klebsiella pneumoniae*. Virology journal 10: 100-100.
- 550 [14] Thiry, D., et al. (2019). New Bacteriophages against Emerging Lineages ST23 and  
551 ST258 of *Klebsiella pneumoniae* and Efficacy Assessment in *Galleria mellonella* Larvae.  
552 Viruses 11(5): 411.
- 553 [15] Ciacci, N., et al. (2018). Characterization of vB\_Kpn\_F48, a newly discovered lytic  
554 bacteriophage for *Klebsiella pneumoniae* of sequence type 101. Viruses 10(9): 482.
- 555 [16] Partridge, S. R., et al. (2015). Emergence of blaKPC carbapenemase genes in Australia.  
556 International Journal of Antimicrobial Agents 45(2): 130-136.
- 557 [17] Shoma, S., et al. (2014). Characterization of multidrug-resistant *Klebsiella pneumoniae*  
558 from Australia carrying blaNDM-1. Diagnostic Microbiology and Infectious Disease 78(1):  
559 93-97.
- 560 [18] O'Tootle G. A. and R. Kolter (1998). Initiation of biofilm formation in *Pseudomonas*  
561 *fluorescens* WCS365 proceeds via multiple, convergent signalling pathways: a genetic  
562 analysis. Molecular Microbiology 23(8): 449-61.

- 563 [19] Domenico, P., et al. (1989). Reduction of capsular polysaccharide production in  
564 *Klebsiella pneumoniae* by sodium salicylate. *Infection and Immunity* 57(12): 3778-3782.
- 565 [20] Hsu, C.-R., et al. (2016). Identification of a capsular variant and characterization of  
566 capsular acetylation in *Klebsiella pneumoniae* PLA-associated type K57. *Scientific Reports*  
567 6: 31946.
- 568 [21] Hitchcock, PJ, Brown, TM. (1983). Morphological heterogeneity among *Salmonella*  
569 lipopolysaccharide chemotypes in silver-stained polyacrylamide gels. *Journal of*  
570 *Bacteriology*, 154(1), pp. 269-277
- 571 [22] Chevallet, M, Luche, S, Rabilloud, T. (2006). Silver staining of proteins in  
572 polyacrylamide gels. *Nature Protocols*, 1(4), pp. 1852-1858
- 573 [23] Fajardo-Lubián, A., et al. (2019). Host adaptation and convergent evolution increases  
574 antibiotic resistance without loss of virulence in a major human pathogen. *PLOS Pathogens*  
575 15(3): e1007218.
- 576 [24] Bankevich, A., et al. (2012). SPAdes: a new genome assembly algorithm and its  
577 applications to single-cell sequencing. *Journal of computational biology: a journal of*  
578 *computational molecular cell biology* 19(5): 455-477.
- 579 [25] Seemann, T., et al. Nullarbor Github <https://github.com/tseemann/nullarbor>
- 580 [26] Lam, M., et al. (2018) Kleborate: comprehensive genotyping of *Klebsiella pneumoniae*  
581 genome assemblies. <https://github.com/katholt/Kleborate>.
- 582 [27] Stamatakis, A. (2014). RAxML version 8: a tool for phylogenetic analysis and post-  
583 analysis of large phylogenies. *Bioinformatics* 30(9): 1312-1313.
- 584 [28] Croucher, N. J., et al. (2015). Rapid phylogenetic analysis of large samples of  
585 recombinant bacterial whole genome sequences using Gubbins. *Nucleic acids research* 43(3):  
586 e15.

- 587 [29] Page, A. J., et al. (2015). Roary: rapid large-scale prokaryote pan genome analysis.  
588 Bioinformatics 31(22): 3691-3693.
- 589 [30] Thomsen, M. C. F., et al. (2016). A bacterial analysis platform: an integrated system for  
590 analysing bacterial whole genome sequencing data for clinical diagnostics and surveillance.  
591 PLOS ONE 11(6): e0157718.
- 592 [31] Arndt, D., et al. (2016). PHASTER: a better, faster version of the PHAST phage search  
593 tool. Nucleic acids research 44(W1): W16-W21.
- 594 [32] Sullivan, M. J., et al. (2011). Easyfig: a genome comparison visualizer. Bioinformatics  
595 (Oxford, England) 27(7): 1009-1010.
- 596 [33] Agyekum, A., et al. (2016). *bla*CTX-M-15 carried by IncF-type plasmids is the  
597 dominant ESBL gene in *Escherichia coli* and *Klebsiella pneumoniae* at a hospital in Ghana.  
598 Diagnostic Microbiology and Infectious Disease 84 (4):328-333.
- 599 [34] Barton, B. M., et al. (1995). A general method for detecting and sizing large plasmids.  
600 Analytical Biochemistry 226(2): 235-240.
- 601 [35] Bradford P.A., et al. (2004). Emergence of carbapenem-resistant *Klebsiella* species  
602 possessing the class A carbapenem-hydrolyzing KPC-2 and inhibitor-resistant TEM-30  $\beta$ -  
603 lactamases in New York City. Clinical Infectious Diseases 39:55–60.
- 604 [36] Villa L, et al. (2010). Replicon sequence typing of IncF plasmids carrying virulence and  
605 resistance determinants. Journal of Antimicrobial Chemotherapy 65:2518–29.
- 606 [37] Clokie MRJ, Kropinski A, Eds. Methods and Protocols, Volume 1: Isolation,  
607 Characterization, and Interactions. Springer Protocols 2009.
- 608 [38] Brettin, T., et al. (2015). RASTtk: A modular and extensible implementation of the  
609 RAST algorithm for building custom annotation pipelines and annotating batches of  
610 genomes. Scientific Reports 5: 8365.

- 611 [39] Adriaenssens, E. M., et al. (2015). Integration of genomic and proteomic analyses in the  
612 classification of the Siphoviridae family. *Virology* 477: 144-154.
- 613 [40] Wyres, K.L., et al. (2016). Identification of *Klebsiella* capsule synthesis loci from whole  
614 genome data. *Microbial Genomics* 2:e000102.
- 615 [41] Lam, M. M. C., et al. (2018). Genetic diversity, mobilisation and spread of the  
616 yersiniabactin-encoding mobile element ICEKp in *Klebsiella pneumoniae* populations.  
617 *Microbial genomics* 4(9): e000196.
- 618 [42] Follador, R., et al. (2016). The diversity of *Klebsiella pneumoniae* surface  
619 polysaccharides. *Microbial genomics* 2(8): e000073-e000073.
- 620 [43] Kos, V., and C. Whitfield (2010) A membrane-located glycosyltransferase complex  
621 required for biosynthesis of the D-galactan I lipopolysaccharide O antigen in *Klebsiella*  
622 *pneumoniae*. *Journal of Biological Chemistry* 285(25):19668-87.
- 623 [44] Bengoechea, J. A., and J. S. Pessoa (2018). *Klebsiella pneumoniae* infection biology:  
624 living to counteract host defences. *FEMS Microbiology Reviews* 43(2):123-144.
- 625 [45] Bell, J.M., et al. (2018). Australian Group on Antimicrobial Resistance (AGAR)  
626 Australian Gram-negative Sepsis Outcome Programme (GNSOP) Annual Report 2016.  
627 *Communicable Diseases Intelligence* 42:S2209-6051(18)00017-9.
- 628 [46] Pan, Y.-J., et al. (2015). Genetic analysis of capsular polysaccharide synthesis gene  
629 clusters in 79 capsular types of *Klebsiella* spp. *Scientific Reports* 5: 15573.
- 630 [47] Ko, K. S. (2016). The contribution of capsule polysaccharide genes to virulence of  
631 *Klebsiella pneumoniae*. *Virulence* 8(5): 485-486.
- 632 [48] Pitt, M. E., et al. (2018). Multifactorial chromosomal variants regulate polymyxin  
633 resistance in extensively drug-resistant *Klebsiella pneumoniae*. *Microbial genomics* 4(3):  
634 e000158.

- 635 [49] Dorman, M. J., et al. (2018). The Capsule Regulatory Network of *Klebsiella pneumoniae*  
636 Defined by density-TraDISort. *mBio* 9(6): e01863-01818.
- 637 [50] Gu, J., et al. (2012). A Method for Generation Phage Cocktail with Great Therapeutic  
638 Potential. *PLOS ONE* 7(3): e31698.
- 639 [51] Bertozzi Silva, J., et al. (2016). Host receptors for bacteriophage adsorption. *FEMS*  
640 *Microbiology Letters* 363(4).
- 641 [52] Nobrega, F. L., et al. (2018). Targeting mechanisms of tailed bacteriophages. *Nature*  
642 *Reviews Microbiology* 16(12): 760-773.
- 643 [53] Abedon, S. T. (2011). Lysis from without. *Bacteriophage* 1(1): 46-49. (Abedon 2011)
- 644 [54] Hsu, C.-R., et al. (2013). Isolation of a bacteriophage specific for a new capsular type of  
645 *Klebsiella pneumoniae* and characterization of its polysaccharide depolymerase. *PLOS ONE*  
646 8(8): e70092.
- 647 [55] Latka, A., et al. (2017). Bacteriophage-encoded virion-associated enzymes to overcome  
648 the carbohydrate barriers during the infection process. *Applied Microbiology and*  
649 *Biotechnology* 101(8): 3103-3119.
- 650 [56] Pires, D.P., et al. (2016). Bacteriophage-encoded depolymerases: their diversity and  
651 biotechnological applications. *Applied Microbiology and Biotechnology* 100: 2141.
- 652 [57] Pan, Y.-J., et al. (2017). *Klebsiella* phage  $\Phi$ K64-1 encodes multiple depolymerases for  
653 multiple host capsular types. *Journal of Virology* 91(6): e02457-02416.
- 654 [58] Canchaya, C., et al. (2004). The impact of prophages on bacterial chromosomes.  
655 *Molecular Microbiology* 53(1): 9-18.

656

## 657 **Acknowledgements**

658 The authors would like to acknowledge Alicia Arnott, Nathan Bachmann, Chayanika Biswas,  
659 Rajat Dhakal, Elena Martinez, Ranjeeta Menon, Rebecca Rockett, Rosemarie Sadsad,

660 Verlaine Timms, Qinning Wang and Vitali Sintchenko at the Pathogen Genomics Unit,  
661 Centre for Infectious Disease and Microbiology –Public Health, Westmead Hospital, for their  
662 assistance with whole genome sequencing; Dongwei Wang for her assistance with TEM;  
663 Sydney Water, Murray McDermott and Graziano (Rowland Village), and Lee Thomas for  
664 their help with specimen collection for bacteriophage isolation.

665

#### 666 **Funding**

667 This project was funded by the National Health and Medical Research Council (NHMRC;  
668 GRP1107322). The Westmead Scientific Platforms are supported by the Westmead Research  
669 Hub, the Cancer Institute New South Wales, the NHMRC and the Ian Potter Foundation.

670

#### 671 **Conflicts of Interest**

672 None to declare.

673

## Figures and Tables

**Table 3. Efficiency of plating of selected CP-K. pneumoniae ST258 clade 1 bacteriophages\*.**

| Isolate (JIE) | ST    | Clade | AmPh_EK29                       |          | AmPh_EK52                       |          | AmPh_EK80                       |          | JIPh_Kp122                      |          | JIPh_Kp127                      |          |
|---------------|-------|-------|---------------------------------|----------|---------------------------------|----------|---------------------------------|----------|---------------------------------|----------|---------------------------------|----------|
| 2713          | ST11  | NA    | none                            | 4        | none                            | 4        | none                            | 4        | ***                             | 3        | ***                             | 3        |
| 2487          | ST11  | 1     | none                            | 4        | none                            | 4        | none                            | 4        | ***                             | 3        | ***                             | 3        |
| 4203          | ST258 | 1     | none                            | 4        | 1.0x10 <sup>9</sup> (125)       | 1        | none                            | 4        | ***                             | 3        | ***                             | 3        |
| 4046          | ST258 | 1     | 1.1x10 <sup>9</sup> (55)        | 1        | 8.0x10 <sup>8</sup> (100)       | 1        | ***                             | 3        | ***                             | 3        | ***                             | 3        |
| 4020          | ST258 | 1     | none                            | 4        | 4.0x10 <sup>9</sup> (500)       | 1        | ***                             | 3        | ***                             | 3        | ***                             | 3        |
| 4019          | ST258 | 1     | none                            | 4        | 2.6x10 <sup>9</sup> (325)       | 1        | ***                             | 3        | ***                             | 3        | ***                             | 3        |
| 4005          | ST258 | 1     | none                            | 4        | 1.6x10 <sup>9</sup> (200)       | 1        | ***                             | 3        | ***                             | 3        | ***                             | 3        |
| 3095          | ST258 | 1     | 4.6x10 <sup>8</sup> (23)        | 1        | 8.0x10 <sup>8</sup> (100)       | 1        | ***                             | 3        | ***                             | 3        | ***                             | 3        |
| 2709          | ST258 | 1     | <b>2.0x10<sup>9</sup> (100)</b> | <b>1</b> | <b>8.0x10<sup>8</sup> (100)</b> | <b>1</b> | 4.0x10 <sup>8</sup> (15)        | <b>1</b> | ***                             | 3        | ***                             | 3        |
| 2733          | ST258 | 1     | 8.0x10 <sup>8</sup> (40)        | 1        | 6.0x10 <sup>8</sup> (75)        | 1        | 4.0x10 <sup>8</sup> (15)        | <b>1</b> | ***                             | 3        | ***                             | 3        |
| 2740          | ST258 | 1     | 4.0x10 <sup>8</sup> (20)        | 1        | 2.6x10 <sup>9</sup> (325)       | 1        | none                            | 4        | ***                             | 3        | ***                             | 3        |
| 2771          | ST258 | 1     | 1.8x10 <sup>9</sup> (90)        | 1        | 4.0x10 <sup>8</sup> (50)        | 1        | ***                             | 3        | ***                             | 3        | ***                             | 3        |
| 2783          | ST258 | 1     | 2.4x10 <sup>9</sup> (120)       | 1        | none                            | 4        | 6.0x10 <sup>9</sup> (100)       | <b>1</b> | 2.5x10 <sup>9</sup> (313)       | <b>1</b> | 1.5x10 <sup>7</sup> (188)       | <b>1</b> |
| 4455          | ST258 | 1     | 2.0x10 <sup>9</sup> (100)       | 1        | 2.5x10 <sup>8</sup> (31)        | 1        | ***                             | 3        | ***                             | 3        | ***                             | 3        |
| 4282          | ST258 | 1     | none                            | 4        | none                            | 4        | <b>6.0x10<sup>9</sup> (100)</b> | <b>1</b> | <b>8.0x10<sup>8</sup> (100)</b> | <b>1</b> | <b>8.0x10<sup>6</sup> (100)</b> | <b>1</b> |
| 2793          | ST512 | NA    | 6.0x10 <sup>8</sup> (30)        | 1        | none                            | 4        | none                            | 4        | ***                             | 3        | ***                             | 3        |
| 4660          | ST258 | 2     | none                            | 4        | none                            | 4        | none                            | 4        | ***                             | 3        | ***                             | 3        |
| 4626          | ST258 | 2     | none                            | 4        | none                            | 4        | none                            | 4        | ***                             | 3        | ***                             | 3        |

\*, in brackets percentage EOP when compared to amplification strain. \*\*\*, indicates clearing in bacterial lawn without single plaque formation (confluent lysis or abortive lysis). Bold, original amplification host. Scores indicate: 1, high titre lysis; 3 and 4, poor or no lysis.



**Table 4. Characteristics of selected *K. pneumoniae* ST258 clade 1-specific bacteriophages.**

| Name<br>(origin)                 | Size bp | GC % | Best NCBI match*<br>(accession; bp)   | Identity<br>% | Coverage<br>% | Classification                                         | t-RNA    | Depolymerase<br>activity | latent<br>period | burst<br>time | burst<br>size |
|----------------------------------|---------|------|---------------------------------------|---------------|---------------|--------------------------------------------------------|----------|--------------------------|------------------|---------------|---------------|
| <b>AmPh_EK29</b><br>(Australia)  | 169353  | 40.8 | vB_Kpn_F48<br>(MG746602; 170764)      | 98            | 95            | <i>Myoviridae</i>                                      | yes (7)  | none detected            | 130              | 50            | 500           |
| <b>AmPh_EK52</b><br>(Australia)  | 40713   | 52.9 | KP32 isolate 192<br>(MH172261; 40635) | 93            | 93            | <i>Podoviridae</i> ;<br><i>Autographivirinae</i>       | no (0)   | yes                      | 110              | 30            | 250           |
| <b>AmPh_EK80</b><br>(Australia)  | 112215  | 44.8 | Sugarland<br>(MG459987; 111103)       | 97            | 91            | <i>Siphoviridae</i> ; T5virus                          | yes (22) | yes                      | 240              | 90            | 75            |
| <b>JIPh_Kp122</b><br>(Australia) | 166475  | 39.6 | JD18<br>(KT239446; 166313)            | 98            | 97            | <i>Myoviridae</i> ;<br><i>Tevenvirinae</i> ; Jd18virus | yes (16) | none detected            | 80               | 60            | 12            |
| <b>JIPh_Kp127</b><br>(Australia) | 113671  | 45.2 | vB_Kpn_IME260<br>(KX845404.2; 123490) | 94            | 92            | <i>Siphoviridae</i> ; T5virus                          | yes (22) | none detected            | 250              | 80            | 142           |

\**K. pneumoniae* specific bacteriophages.

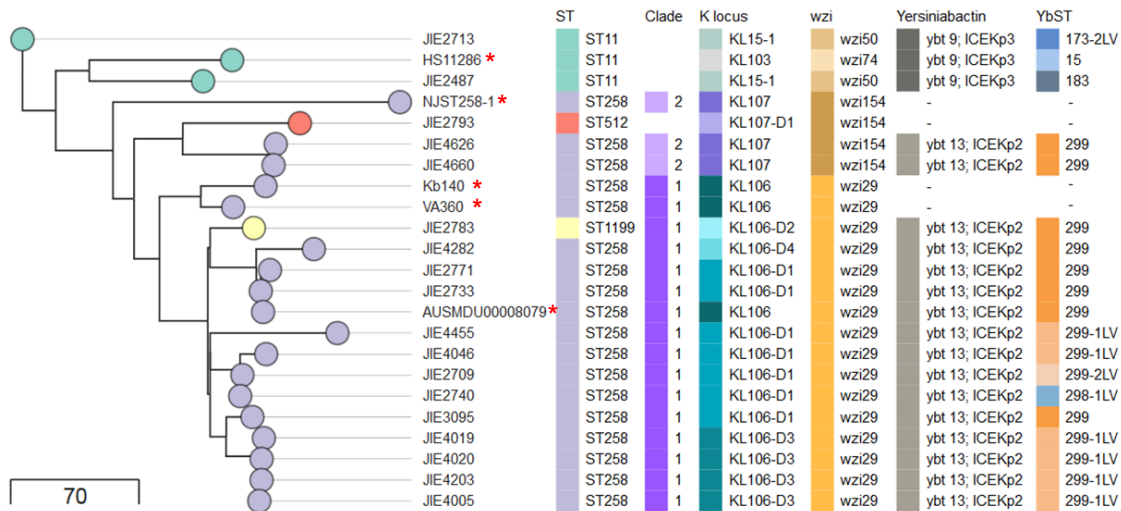

**Figure 1. *K. pneumoniae* CG258 phylogeny.** Recombination-free maximum-likelihood phylogenetic tree of 18 *K. pneumoniae* CG258 isolates and five publically available reference genomes (\*). Metadata include MLST; CG258 clade; *cps* type (KL and *wzi*); Yersiniabactin, ICEKp and ST (YbST). Tree scale corresponds to number of substitutions.

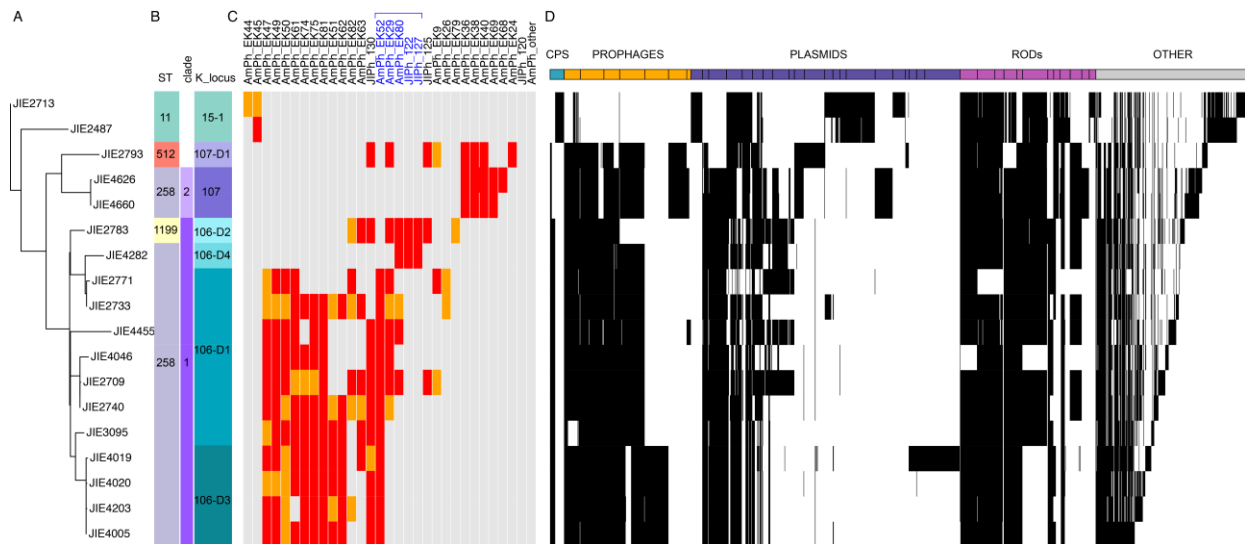

**Figure 2. Phage susceptibility profiles and regions of differences.** A) *K. pneumoniae* CG258 isolates phylogeny; B) metadata including ST, CG258 clade and K locus type; C) phage susceptibility profiles colour-coded based on therapeutic application potential as follows; grey, unsuitable for further testing (no lysis); orange, poor lytic activity; red, best candidates for further characterization (high lytic activity). Five phages (highlighted in blue) were selected for full characterization; D) regions of difference profiles identified using Roary (black, present). Genes corresponding to the accessory genome (n=1683) were reordered according to their synteny where possible, and classified according to functional categories into regions of difference as follows: CPS, capsule associated-genes; prophage-related regions; plasmid-related regions; other regions of differences (RODs) such as ICE elements; and other genes present in variable regions <10 consecutive genes. Details of regions are listed in Table S2.

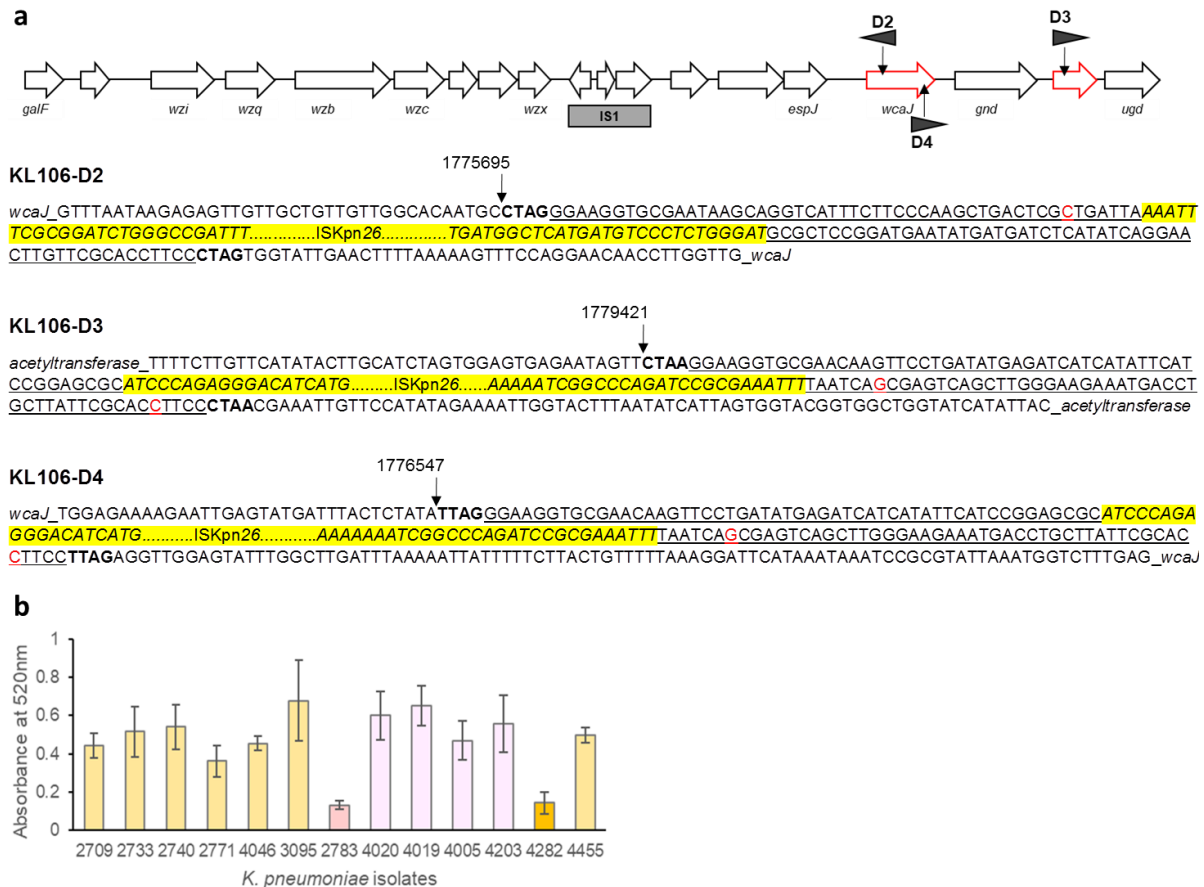

**Figure 3. *cps* locus variants in *K. pneumoniae* ST258 clade 1 isolates. a)** Schematic representing the *cps* locus gene arrangement in ST258 clade 1 isolates (KL106-D1; GenBank KR007677.1). Black triangles indicate ISKpn26 insertions (directional) producing three variants (D2, D3 and D4). Drawing not to scale. Nucleotide sequence for ISKpn26 insertions interrupting the *wcaJ* open reading frame (D2 and D4) and the acetyltransferase gene (D3) in the *cps* locus. In **bold**, insertion sequence (IS) direct repeats. Underlined, IS imperfect inverted repeats. ‘Yellow highlight’, indicates complete ISKpn26 coding region. Nucleotide sequences of *cps* loci for variants KL106-D2 (JIE2783), KL106-D3 (JIE4005) and KL106-D4 (JIE4282) were deposited in GenBank. **b)** Capsule production assay. Capsule produced by ST258 clade 1 isolates was quantified based on uronic acid content (19,20). Results presented are average counts of three separate replicates.

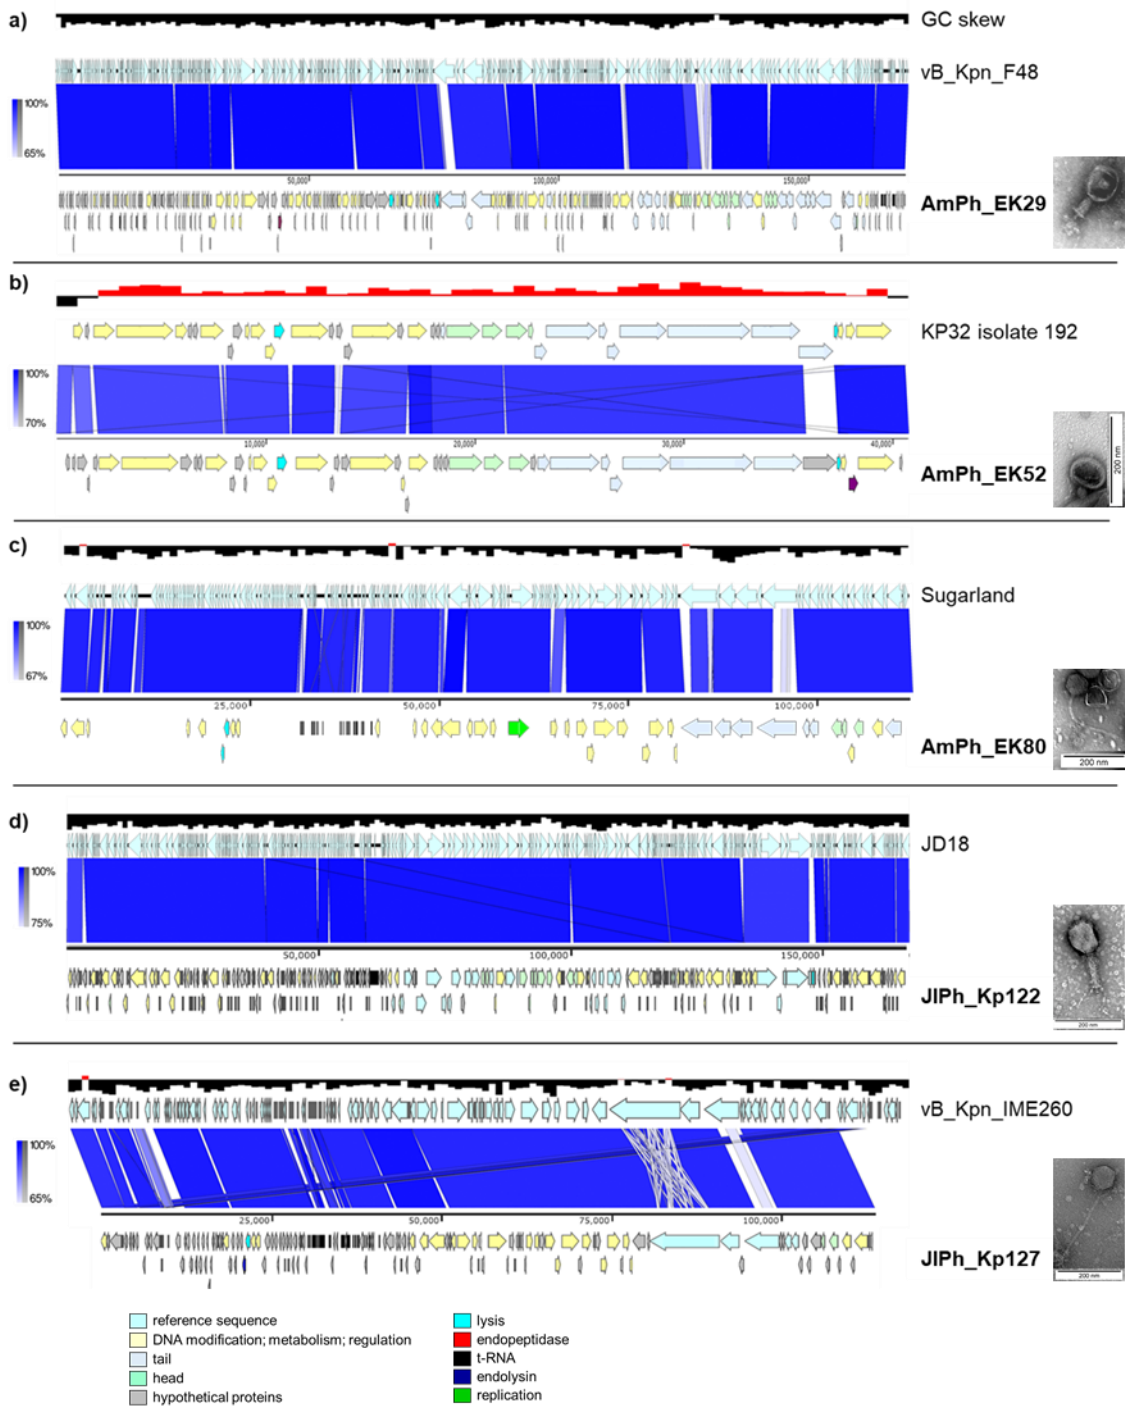

**Figure 4. Comparative genome analysis of five sequenced *K. pneumoniae* ST258 bacteriophages.** Schematics were produced using EasyFig (32) and show the structural organization of the selected phages compared to their best match (>95% nucleotide homology) reference in the GenBank database. Genes are color coded according to function. Phage morphology was captured using transmission electron microscopy.
